# 1 **Modelling the population-level protection conferred by COVID-19 vaccination**

2

3 Pranesh Padmanabhan<sup>1,\*</sup>, Rajat Desikan<sup>2,‡</sup>, Narendra M. Dixit<sup>2,3,\*</sup>

4

5 <sup>1</sup>Clem Jones Centre for Ageing Dementia Research, Queensland Brain Institute, The University of Queensland,  
6 Brisbane, Australia 4072

7 <sup>2</sup>Department of Chemical Engineering, Indian Institute of Science, Bangalore, India 560012

8 <sup>3</sup>Centre for Biosystems Science and Engineering, Indian Institute of Science, Bangalore, India 560012

9 <sup>‡</sup>Current Address: Certara QSP, Certara UK Limited, Sheffield, UK

10

## 11 **\*Correspondence:**

12 Pranesh Padmanabhan, Narendra M. Dixit

13 Email: p.padmanabhan@uq.edu.au; narendra@iisc.ac.in

14

## 15 **One sentence summary:**

16 Viremic control by the spectrum of neutralizing antibodies elicited by vaccination determines COVID-19  
17 vaccine efficacies.

18

## 19 **Manuscript details:**

20 Abstract: 125 words; Text: ~2500 words; Figures: 4; References: 58 (30 in main text)

21 Supplementary Materials: Tables: 3; Figures: 5

22 **Although severe acute respiratory syndrome coronavirus 2 (SARS-CoV-2) vaccines work**  
23 **predominantly by eliciting neutralizing antibodies (NAbs), how the protection they confer**  
24 **depends on the NAb response to vaccination is unclear. Here, we collated and analysed *in***  
25 ***vitro* dose-response curves of >70 NAbs and constructed a landscape defining the**  
26 **spectrum of neutralization efficiencies of NAbs elicited. We mimicked responses of**  
27 **individuals by sampling NAb subsets of known sizes from the landscape and found that**  
28 **they recapitulated responses of convalescent patients. Combining individual responses**  
29 **with a mathematical model of within-host SARS-CoV-2 infection post-vaccination, we**  
30 **predicted how the population-level protection conferred would increase with the NAb**  
31 **response to vaccination. Our predictions captured the outcomes of vaccination trials. Our**  
32 **formalism may help optimize vaccination protocols, given limited vaccine availability.**

33

34 Approved SARS-CoV-2 vaccines have shown remarkable but varying efficacies in  
35 clinical trials, reducing the incidence of symptomatic infections by 62-96% (1-4). The  
36 protection has been found to be predominantly due to NAbs elicited by the vaccines; cellular  
37 immunity appeared to play a secondary role (1, 2). The NAb response elicited by primary  
38 SARS-CoV-2 infection is diverse, spanning >1000-fold variation in Ab titres and *in vitro*  
39 neutralization efficiencies across individuals (5, 6), and appears not to correlate with disease  
40 severity (7). NAb titres following vaccination were comparable to or even lower at times than  
41 those from convalescent patients (1, 2, 8). The protection accorded by the vaccines is thus  
42 surprising. It is possible, based on animal studies (9), that lower NAb titres are protective at the  
43 time of challenge than post infection. Knowledge of how the level of protection depends on the

44 NAb titres and their neutralization efficiencies is lacking. This knowledge gap hinders rational  
45 optimization of vaccination protocols, which is important today given limited vaccine supplies  
46 (10). Here, we developed a mathematical model that quantitatively predicts the population-  
47 level protection conferred by vaccines as a function of the NAb responses they elicit.

48 A major challenge to describing the effects of vaccination is the diversity of the NAb  
49 responses elicited; no formalism exists to predict the diversity or its effects on protection. We  
50 addressed this challenge by adapting the classic idea of *shape space*, which has aided  
51 quantification of the immune repertoire (11), for characterizing NAbs. Accordingly, we sought  
52 features, also termed shape parameters, of the NAbs that would predict their neutralization  
53 efficiencies. Numerous studies have isolated individual NAbs from patients and assessed their  
54 neutralization efficiencies *in vitro*, with the aim of developing NAbs for therapeutic  
55 applications. We compiled dose-response curves (DRCs) of >70 NAbs thus isolated and fit  
56 them using the standard sigmoidal function as well as the median-effect equation (12)  
57 (materials and methods, fig. S1, table S1). The equations fit the data well (Fig. 1A, and figs.  
58 S2 and S3), indicating that two parameters, the 50% inhibitory concentration,  $IC_{50}$ , and the  
59 slope,  $m$ , of the DRC, were sufficient to characterize the neutralization efficiency of the NAbs  
60 (Fig. 1A and table S1). The best-fit  $IC_{50}$  and  $m$  varied widely across NAbs (Fig. 1B).  $IC_{50}$   
61 ranged from  $\sim 10^{-3}$   $\mu\text{g/ml}$  to  $\sim 140$   $\mu\text{g/ml}$  (Fig. 1B), in close agreement with reported estimates,  
62 giving us confidence in the fits (fig. S4A and table S1).  $m$ , the importance of which has been  
63 recognized with HIV-1 and hepatitis C (12, 13) but has not typically been reported for SARS-  
64 CoV-2, spanned the range of  $\sim 0.2$  to 2 (Fig. 1). This variability in  $IC_{50}$  and  $m$  was not restricted

65

66

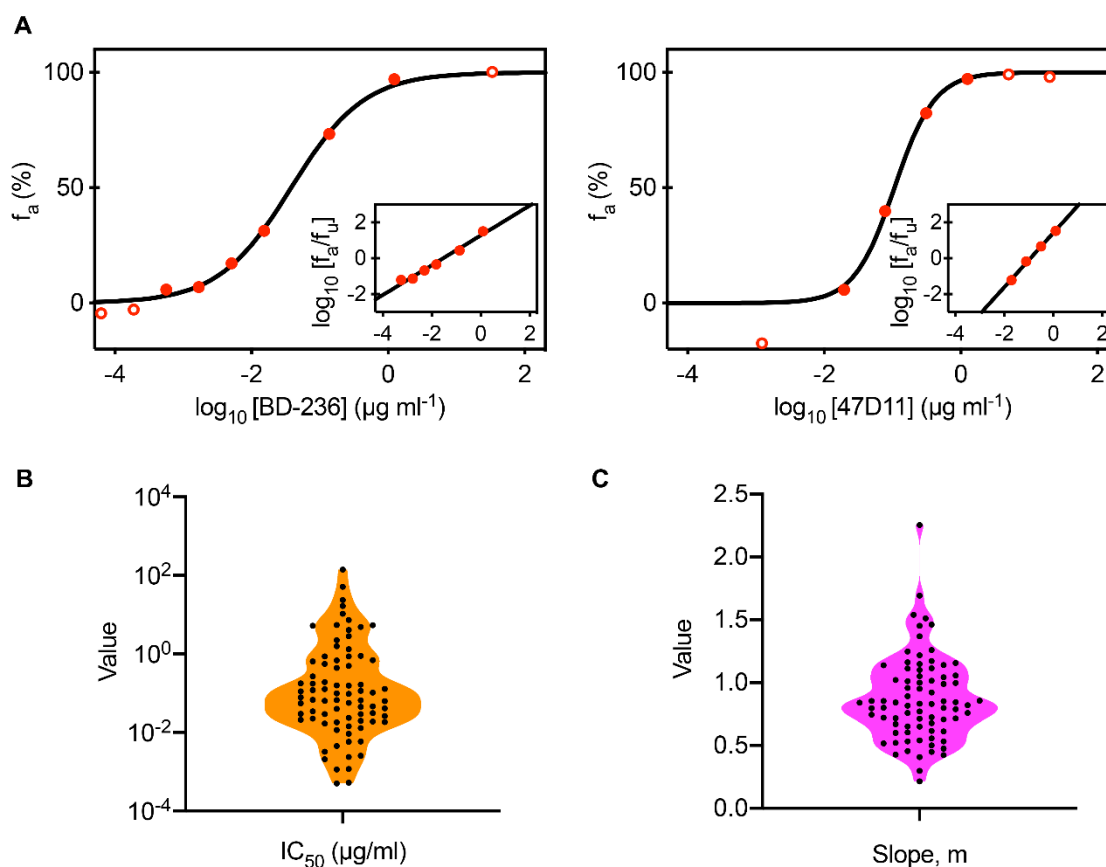

67  
68

69 **Figure 1. Analysis of dose-response curves of SARS-CoV-2 NAb.** (A) Fits (lines) of the  
70 standard sigmoidal equation and the median-effect equation (*inset*) to published experimental  
71 data (circles) of the fraction of infection events blocked,  $f_u$ , as a function of NAb concentration,  
72 shown for two NAb, BD-236 (left) and 47D11 (right). Experimental data points with  $1\% < f_u$   
73  $< 99\%$  (filled circles) were considered for parameter estimation. Fits for the remaining NAb  
74 are in figs. S2 and S3. The best-fit estimates of (B)  $IC_{50}$  and (C)  $m$  for all the NAb analysed.

75

76 to a particular pseudotyped virus construct or backbone used (fig. S4, B and C), the cell line  
77 used (fig. S4, D and E), or assay conditions, which could vary across studies (fig. S4, F and G).

78 The variability was thus intrinsic to the NAb, indicating the spectrum of NAb elicited.

79 Furthermore, akin to HIV-1 antibodies (12), the variations in  $IC_{50}$  and  $m$  of the SARS-CoV-2

80 NAb appeared independent. For instance, the NAb BD-361 and REGN10954 had similar  $IC_{50}$

81 (both  $\sim 0.04 \mu\text{g/ml}$ ), but vastly different  $m$  ( $\sim 0.7$  and  $\sim 1.5$ , respectively), whereas the NAb

82 CC12.3 and 515-5 had vastly different  $IC_{50}$  ( $\sim 0.02 \mu\text{g/ml}$  and  $1.6 \mu\text{g/ml}$ , respectively), but

83 similar  $m$  (both  $\sim 1$ ).  $IC_{50}$  and  $m$  were thus not only sufficient but also necessary for quantifying  
84 the neutralization efficiencies of NABs. We therefore employed  $IC_{50}$  and  $m$  as the required  
85 shape parameters. Plotting the NABs on an  $IC_{50}$ - $m$  plot, we identified the NAB shape space  
86 (Fig. 2), which, because of its two-dimensional nature, we termed the ‘landscape of SARS-  
87 CoV-2 NABs’.

88

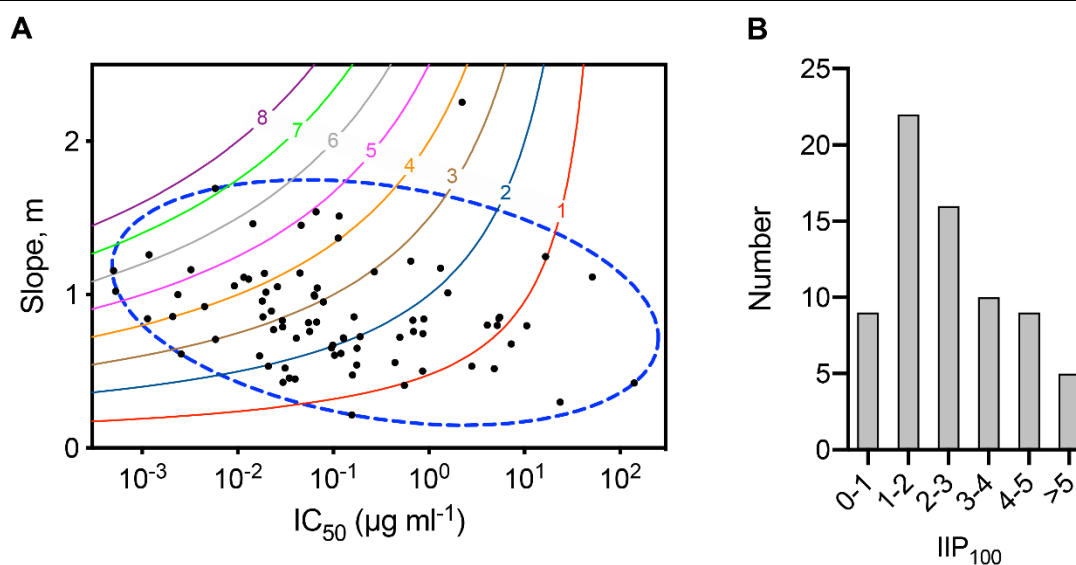

89

90 **Figure 2. The landscape of SARS-CoV-2 NABs.** (A) SARS-CoV-2 NABs analysed in Fig. 1  
91 depicted on an  $IC_{50}$ - $m$  plot. Each dot represents a NAB. 8 NABs that have multiple neutralisation  
92 curves reported are represented multiple times (table S1). Solid lines are loci of points  
93 corresponding to fixed  $IIP$  values computed at 100 µg/ml. The ellipse (blue dashed line)  
94 circumscribes the landscape of SARS-CoV-2 NABs elicited. (B) The distribution of  $IIP_{100}$   
95 values of NABs. Average  $IIP_{100}$  values are used for the 8 NABs mentioned above.

96

97 The landscape contains potent NABs, with low  $IC_{50}$  and high  $m$ , as well as weak NABs,  
98 with the opposite traits. To compare the NABs, we employed the instantaneous inhibitory  
99 potential ( $IIP$ ), a composite metric of  $IC_{50}$  and  $m$  (12-14).  $IIP_D$  represents the  $\log_{10}$  decline in  
100 viral load in a single round infection assay due to the NAB present at concentration  $D$ . Thus,  
101 the higher is the  $IIP_D$ , the more potent is the NAB at concentration  $D$ . NABs displayed a wide  
102 distribution of  $IIP_{100}$  values (Fig. 2B and table S1): We found that 5 NABs had the highest  $IIP_{100}$

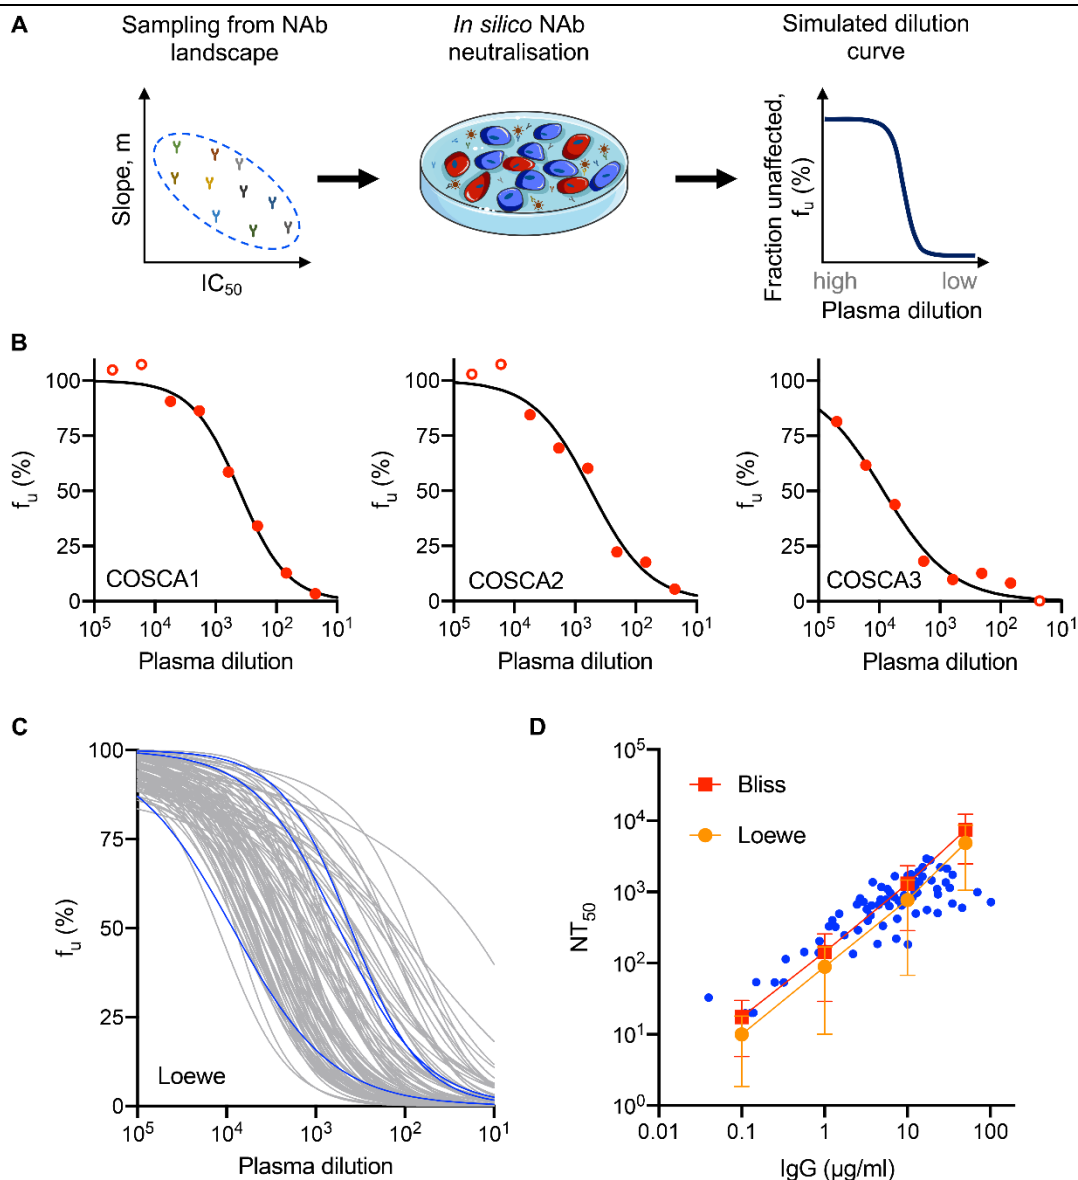

**Figure 3. NAb landscape and patient responses.** (A) Schematic of the procedure to predict plasma dilution curves. We represent an individual's plasma by a sample of NABs from the landscape. We predict the fraction of infection events unaffected by NABs,  $f_u$ , at a given plasma dilution in *in vitro* pseudovirus neutralization assays and repeat this at different dilutions to obtain the dilution curve. (B) Representative plasma dilution curves obtained as fits (lines) of

the equation  $f_u = \frac{(g)^n}{(g)^n + (NT_{50})^n}$  to reported data (circles) from three patients (15), where  $n$  is

the Hill coefficient,  $g$  is the plasma dilution and  $NT_{50}$  is the half-maximal inhibitory plasma neutralizing titre. Experimental data points with  $1\% < f_u < 99\%$  (filled circles) were considered for parameter estimation. (C) Predictions (lines) of plasma dilution curves. We assumed ten NABs per patient. Blue lines are fits shown in B.  $D_0 = 30 \mu\text{g/ml}$ . (D) Half-maximal inhibitory plasma neutralizing titre,  $NT_{50}$ , as a function of total NAB concentration. Blue circles are reported estimates from convalescent patients. Red squares and orange circles are the mean of  $NT_{50}$  values predicted from 100 virtual patients at each NAB concentration using Bliss independence and Loewe additivity, respectively. The error bars are standard deviations.

118 values, >5, and 9 had the least, <1 ( $D = 100 \mu\text{g/mL}$ ) (Fig. 2B and table S1). This distribution  
119 of  $IIP_{100}$  values demonstrated further the wide spectrum of neutralization efficiencies of NAbs.

120 The landscape established bounds on the neutralization efficiencies of the NAbs elicited.  
121 We reasoned next that the diversity of the NAb responses across individuals would arise from  
122 the way NAbs are sampled from the landscape. Although a large number of NAbs can be  
123 isolated from individuals, studies of convalescent patient plasma (5, 6, 16-18) as well as on  
124 NAb epitope profiling (19) have argued that the NAb response of an individual can be attributed  
125 to a small subset of 5-10 distinct NAbs. Furthermore, while some epitopes on the SARS-CoV-  
126 2 spike protein, S, are targeted more than others by NAbs, the collection of NAbs produced  
127 differs substantially across individuals (20). We therefore assumed that the response elicited  
128 by an infected individual would be a *small, random subset* of the landscape. We analysed DRCs  
129 of NAbs isolated from individual patients and found that they indeed constituted such random  
130 subsets in the landscape (fig. S5). Accordingly, we sampled random combinations of 10 NAbs  
131 each, each combination representing the response of an individual. We let NAb concentrations  
132 vary across individuals, to mimic the observed variation of the NAb titres (16-18). We  
133 quantified the neutralization efficiency of the NAb response by simulating standard plasma  
134 dilution assays (materials and methods, Fig. 3A). We let the NAbs exhibit Bliss independence  
135 or Loewe additivity, the former representing NAbs targeting distinct, non-occluding epitopes  
136 and the latter the same or occluding epitopes (21). Our simulations recapitulated the dilution  
137 curves associated with patient plasma (Fig. 3, B and C). The values of  $NT_{50}$ , the dilution at  
138 which the neutralization efficiency of the plasma decreases by 50%, were in agreement with  
139 experimental observations (17) (Fig. 3D). The data was described better by Bliss independence

140 at low NAb titres and Loewe additivity at high titres. This is expected because at low titres, the  
141 NAbS are unlikely to interact with each other and would thus follow Bliss independence,  
142 whereas at high titres, they may compete for binding sites on S or occlude each other and thus  
143 exhibit Loewe additivity (21). At any NAb titre, there existed substantial variation in  $NT_{50}$ ,  
144 attributed to the random combinations of NAbS sampled. The variation, however, was  
145 outweighed by the overall rise of  $NT_{50}$  with the NAb titre, consistent with patient data (Fig.  
146 3D). For instance, the  $NT_{50}$  was  $17 \pm 13$  at the IgG titre of  $0.1 \mu\text{g/ml}$  and  $1300 \pm 1000$  at  $10 \mu\text{g/ml}$ .  
147 Sampling from the NAb landscape thus successfully recapitulated patient responses. We were  
148 able to describe the diversity of the NAb responses elicited across patients. Armed with this  
149 description, we examined next the protection accorded by vaccines in clinical trials.

150 Following vaccination, NAb titres rise and are expected to remain stable (or decay  
151 slowly) over weeks to months (22), protecting individuals who might get exposed to the virus  
152 during this period. Individuals were assumed to be protected if they did not report symptomatic  
153 infection; loss of protection involved symptoms and a positive result on a nucleic acid  
154 amplification test (1, 2). Protection with NAbS is expected not to be sterilizing, as suggested  
155 by animal studies (9); NAbS help suppress the peak in viremia, thereby reducing symptoms,  
156 and facilitate more rapid clearance of the infection. If the peak is sufficiently suppressed, no  
157 symptoms may result, as is the case with the ~40% of natural infections that remain  
158 asymptomatic (7). Here, we assumed that an individual would be detected as symptomatically  
159 infected if the viral load rose above a threshold during the infection.

160 To estimate the peak viral load, we developed a mathematical model of the early time  
161 course of the infection, where the viral load typically rises, attains a peak, and declines (23),



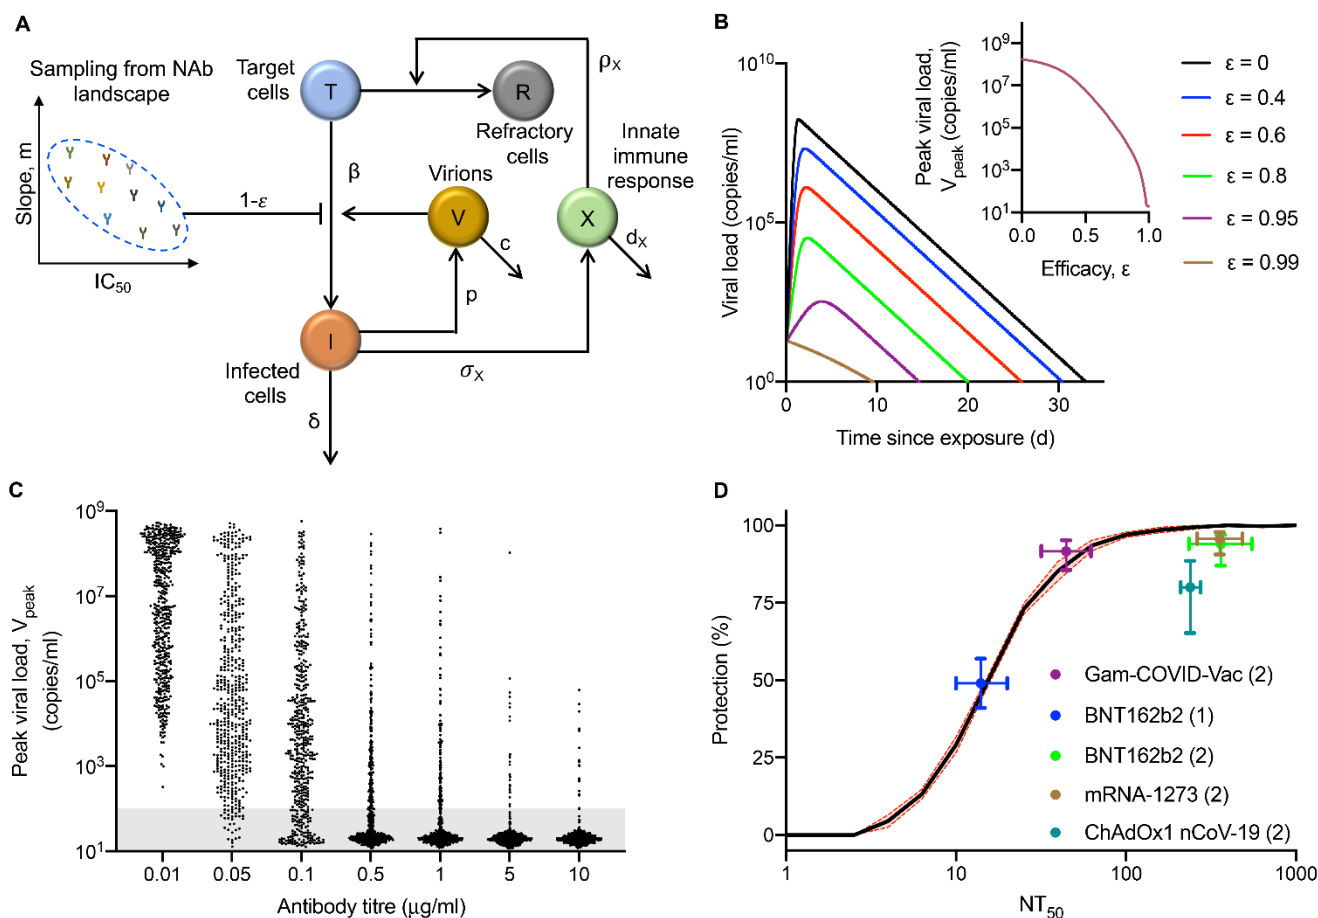

162

163 **Figure 4. SARS-CoV-2 dynamics and protection post-vaccination.** (A) Schematic of the  
 164 model of within-host SARS-CoV-2 dynamics post-vaccination depicting the interactions  
 165 between target cells,  $T$ , infected cells,  $I$ , refractory cells,  $R$ , virions,  $V$ , innate immune  
 166 response,  $X$ , and pre-existing NAb, sampled from the landscape. (B) Predictions of viral load in non-  
 167 vaccinated (black line) and vaccinated (coloured lines) individuals with different fixed  
 168 efficacies of NAb indicated. *Inset*: Predicted peak viral load at different efficacies. (C)  
 169 Predictions of peak viral load at different NAb titres. Each dot represents a patient. (D) Model  
 170 predictions of the relationship between mean protection and  $NT_{50}$  (solid line) compared with  
 171 data from vaccination trial (symbols). The number of doses of the vaccine administered is  
 172 mentioned in brackets. The error bars (dashed lines) in the protection curve are the standard  
 173 deviation from 5 realizations of *in silico* patient populations. The data from the trials used is  
 174 summarized in table S3. The model equations and simulation procedure are described in  
 175 materials and methods.

176

177 and applied it to describe the effect of vaccination (Fig. 4A, table S2, materials and methods).

178 The structure of the model mimics recent models that have captured patient data of viral load

179 changes following primary infection (24, 25) (see Fig. 4B,  $\epsilon=0$ ). In addition, we assumed that

180 NABs generated following vaccination would exist at the start of infection and neutralize free  
181 viruses, effectively reducing viral infectivity. The greater the reduction in infectivity, the lower  
182 the peak viral load (Fig. 4B,  $\epsilon > 0$ ). Significant *de novo* NAb production post-infection typically  
183 occurs after the peak in viremia (7). We therefore considered pre-existing NABs as responsible  
184 for protection and assumed their titres not to vary substantially during the course of the  
185 infection, given the typically short course of the infection and the much longer durability of the  
186 NAB response to vaccination (22). (Our model is not applicable to natural infection before  
187 vaccination; no models are currently capable of correctly describing NAB responses following  
188 primary infection.) We let the pre-existing NABs be drawn as random subsets from the  
189 landscape, as we did above. The NABs neutralized free viruses with an efficiency that we  
190 estimated using Loewe additivity between the individual NABs (Fig. 4). NAB titres in the lung  
191 airways are expected to be similar to those in the blood given the close coupling between the  
192 lungs and the circulatory system (7). We simulated a virtual patient population of 3500  
193 individuals, on the order of the number of individuals infected in the placebo arms of clinical  
194 trials. The individuals all had distinct viral dynamics parameters drawn from known ranges  
195 (table S2), to mimic interpatient variability in addition to the variability arising from NAB  
196 sampling from the landscape. Our model predicted wide variability in the peak viral load (Fig.  
197 4C). At low pre-existing NAB concentrations ( $0.01 \mu\text{g/mL}$ ), indicative of the scenario without  
198 vaccination, the predicted peak viral load ranged from  $\sim 10^3$  to  $10^9$  copies/ml, consistent with  
199 the range in symptomatic individuals (26). The peaks declined as NAB titres increased. The  
200 limit of detection is  $\sim 10^2$  copies/ml (27), which we set as the threshold for symptomatic

201 infection that would be detected in trials. The fraction of individuals with peaks below detection  
202 would indicate the level of protection due to the vaccine.

203 To quantify the mean level of protection and test it against data from clinical trials, we  
204 used viral dynamics parameters representative of symptomatic infections (24, 25) (table S2)  
205 and simulated the dynamics in 5 cohorts of 2000 infected individuals each. Vaccination studies  
206 report the  $NT_{50}$  values of the NAb responses elicited and the associated mean protection level,  
207 or efficacy (table S3). We binned the different individuals into narrow  $NT_{50}$  bands and  
208 calculated the mean protection in each band. We found that the mean protection was low for  
209  $NT_{50} \sim 1$ . It increased in a sigmoidal manner to 50% at  $NT_{50} \sim 20$  and asymptotically reached  
210 100% at  $NT_{50} \sim 200$ . Remarkably, the data for nearly all approved vaccines fell on this  
211 ‘protection curve’, explaining the protection they confer (Fig. 4D). Thus, for instance, a single  
212 dose of the vaccine BNT 162b2 elicited NABs with  $NT_{50}$  of 14 and accorded 49% protection.  
213 Following two doses, the corresponding values were 361 and 94%, respectively. These values  
214 as well as those for other vaccines were captured accurately by our model predictions. The only  
215 exception was ChAdOx1 nCoV-19, which had a lower protection than predicted, the reasons  
216 for which remain to be elucidated.

217 Our study provides the first conceptual, mechanistic and quantitative understanding of  
218 the protection conferred by COVID-19 vaccines. Our findings would inform strategies for  
219 optimal vaccine deployment. With limited vaccine availability, it would be useful to estimate  
220 the protection realizable by a single dose of a prime-boost vaccine, especially in younger, less  
221 vulnerable adults (10). Our formalism would enable this estimation: measurements of  
222 corresponding  $NT_{50}$  values would allow reading off the expected protection levels from our

223 protection curve. Similarly, using measurements of the waning of NAb titres post-vaccination,  
224 how the population-level protection due to pre-existing NAb would fade could be predicted.  
225 Protection would then rely on memory B cell responses, which are yet to be fully understood  
226 (28), or indicate the need for revaccination. Our study did not consider viral mutations because  
227 with 5-10 NAb active, viral escape from NAb responses is expected to be unlikely (19, 29).  
228 With the new circulating strains (30), however, the NAb landscape may have to be  
229 reconstructed. Future studies may report DRCs of NAb against the new strains, facilitating  
230 such reconstruction.

231

## 232 **References**

- 233 1. L. R. Baden *et al.*, Efficacy and safety of the mRNA-1273 SARS-CoV-2 vaccine. *N Engl*  
234 *J Med* **384**, 403-416 (2021).
- 235 2. F. P. Polack *et al.*, Safety and efficacy of the BNT162b2 mRNA COVID-19 vaccine. *N*  
236 *Engl J Med* **383**, 2603-2615 (2020).
- 237 3. M. Voysey *et al.*, Safety and efficacy of the ChAdOx1 nCoV-19 vaccine (AZD1222)  
238 against SARS-CoV-2: an interim analysis of four randomised controlled trials in Brazil,  
239 South Africa, and the UK. *Lancet* **397**, 99-111 (2021).
- 240 4. D. Y. Logunov *et al.*, Safety and efficacy of an rAd26 and rAd5 vector-based heterologous  
241 prime-boost COVID-19 vaccine: an interim analysis of a randomised controlled phase 3  
242 trial in Russia. *Lancet* **397**, 671-681 (2021).
- 243 5. L. Liu *et al.*, Potent neutralizing antibodies against multiple epitopes on SARS-CoV-2  
244 spike. *Nature* **584**, 450-456 (2020).
- 245 6. D. F. Robbiani *et al.*, Convergent antibody responses to SARS-CoV-2 in convalescent  
246 individuals. *Nature* **584**, 437-442 (2020).
- 247 7. A. Sette, S. Crotty, Adaptive immunity to SARS-CoV-2 and COVID-19. *Cell* **184**, 861-  
248 880 (2021).

- 249 8. P. M. Folegatti *et al.*, Safety and immunogenicity of the ChAdOx1 nCoV-19 vaccine  
250 against SARS-CoV-2: a preliminary report of a phase 1/2, single-blind, randomised  
251 controlled trial. *Lancet* **396**, 467-478 (2020).
- 252 9. K. McMahan *et al.*, Correlates of protection against SARS-CoV-2 in rhesus macaques.  
253 *Nature* **590**, 630-634 (2021).
- 254 10. K. M. Bubar *et al.*, Model-informed COVID-19 vaccine prioritization strategies by age and  
255 serostatus. *Science* **371**, 916-921 (2021).
- 256 11. A. S. Perelson, G. F. Oster, Theoretical studies of clonal selection: Minimal antibody  
257 repertoire size and reliability of self-non-self discrimination. *J Theor Biol* **81**, 645-670  
258 (1979).
- 259 12. N. E. Webb, D. C. Montefiori, B. Lee, Dose-response curve slope helps predict therapeutic  
260 potency and breadth of HIV broadly neutralizing antibodies. *Nat Commun* **6**, 8443 (2015).
- 261 13. P. Padmanabhan, N. M. Dixit, Inhibitors of hepatitis C virus entry may be potent  
262 ingredients of optimal drug combinations. *Proc Natl Acad Sci U S A* **114**, E4524-E4526  
263 (2017).
- 264 14. B. L. Jilek *et al.*, A quantitative basis for antiretroviral therapy for HIV-1 infection. *Nat*  
265 *Med* **18**, 446-451 (2012).
- 266 15. P. J. M. Brouwer *et al.*, Potent neutralizing antibodies from COVID-19 patients define  
267 multiple targets of vulnerability. *Science* **369**, 643-650 (2020).
- 268 16. B. Isho *et al.*, Persistence of serum and saliva antibody responses to SARS-CoV-2 spike  
269 antigens in COVID-19 patients. *Sci Immunol* **5**, eabe5511 (2020).
- 270 17. A. S. Iyer *et al.*, Persistence and decay of human antibody responses to the receptor binding  
271 domain of SARS-CoV-2 spike protein in COVID-19 patients. *Sci Immunol* **5**, eabe0367  
272 (2020).
- 273 18. K. Röltgen *et al.*, Defining the features and duration of antibody responses to SARS-CoV-  
274 2 infection associated with disease severity and outcome. *Sci Immunol* **5**, eabe0240 (2020).
- 275 19. E. Shrock *et al.*, Viral epitope profiling of COVID-19 patients reveals cross-reactivity and  
276 correlates of severity. *Science* **370**, eabd4250 (2020).
- 277 20. M. Yuan *et al.*, Structural basis of a shared antibody response to SARS-CoV-2. *Science*  
278 **369**, 1119-1123 (2020).
- 279 21. C. T. Meyer *et al.*, Quantifying drug combination synergy along potency and efficacy axes.  
280 *Cell Systems* **8**, 97-108.e116 (2019).

- 281 22. A. T. Widge *et al.*, Durability of responses after SARS-CoV-2 mRNA-1273 vaccination.  
282 *N Engl J Med* **384**, 80-82 (2021).
- 283 23. R. Wölfel *et al.*, Virological assessment of hospitalized patients with COVID-2019. *Nature*  
284 **581**, 465-469 (2020).
- 285 24. A. Goyal, E. F. Cardozo-Ojeda, J. T. Schiffer, Potency and timing of antiviral therapy as  
286 determinants of duration of SARS-CoV-2 shedding and intensity of inflammatory  
287 response. *Sci Adv* **6**, eabc7112 (2020).
- 288 25. A. Gonçalves *et al.*, Timing of antiviral treatment initiation is critical to reduce SARS-  
289 CoV-2 viral load. *CPT: Pharmacometrics & Systems Pharmacology* **9**, 509-514 (2020).
- 290 26. J. Fajnzylber *et al.*, SARS-CoV-2 viral load is associated with increased disease severity  
291 and mortality. *Nat Commun* **11**, 5493 (2020).
- 292 27. R. Arnaout *et al.*, SARS-CoV2 testing: the limit of detection matters. *bioRxiv*  
293 10.1101/2020.1106.1102.131144 (2020).
- 294 28. R. R. Goel *et al.*, Longitudinal analysis reveals distinct antibody and memory B cell  
295 responses in SARS-CoV2 naïve and recovered individuals following mRNA vaccination.  
296 *medRxiv* 10.1101/2021.1103.1103.21252872 (2021).
- 297 29. A. Baum *et al.*, Antibody cocktail to SARS-CoV-2 spike protein prevents rapid mutational  
298 escape seen with individual antibodies. *Science* **369**, 1014-1018 (2020).
- 299 30. T. C. Williams, W. A. Burgers, SARS-CoV-2 evolution and vaccines: cause for concern?  
300 *Lancet Respiratory Medicine* 10.1016/S2213-2600(1021)00075-00078 (2021).
- 301 31. X. Chi *et al.*, A neutralizing human antibody binds to the N-terminal domain of the Spike  
302 protein of SARS-CoV-2. *Science* **369**, 650-655 (2020).
- 303 32. C. Wang *et al.*, A human monoclonal antibody blocking SARS-CoV-2 infection. *Nat*  
304 *Commun* **11**, 2251 (2020).
- 305 33. E. Seydoux *et al.*, Analysis of a SARS-CoV-2-infected individual reveals development of  
306 potent neutralizing antibodies with limited somatic mutation. *Immunity* **53**, 98-105 e105  
307 (2020).
- 308 34. R. Shi *et al.*, A human neutralizing antibody targets the receptor-binding site of SARS-  
309 CoV-2. *Nature* **584**, 120-124 (2020).
- 310 35. A. Z. Wec *et al.*, Broad neutralization of SARS-related viruses by human monoclonal  
311 antibodies. *Science* **369**, 731-736 (2020).
- 312 36. C. Lei *et al.*, Neutralization of SARS-CoV-2 spike pseudotyped virus by recombinant  
313 ACE2-Ig. *Nat Commun* **11**, 2070 (2020).

- 314 37. Z. Lv *et al.*, Structural basis for neutralization of SARS-CoV-2 and SARS-CoV by a potent  
315 therapeutic antibody. *Science* **369**, 1505-1509 (2020).
- 316 38. S. J. Zost *et al.*, Potently neutralizing and protective human antibodies against SARS-CoV-  
317 2. *Nature* **584**, 443-449 (2020).
- 318 39. B. Ju *et al.*, Human neutralizing antibodies elicited by SARS-CoV-2 infection. *Nature* **584**,  
319 115-119 (2020).
- 320 40. Y. Cao *et al.*, Potent neutralizing antibodies against SARS-CoV-2 identified by high-  
321 throughput single-cell sequencing of convalescent patients' B cells. *Cell* **182**, 73-84 e16  
322 (2020).
- 323 41. J. Hansen *et al.*, Studies in humanized mice and convalescent humans yield a SARS-CoV-  
324 2 antibody cocktail. *Science* **369**, 1010-1014 (2020).
- 325 42. T. F. Rogers *et al.*, Isolation of potent SARS-CoV-2 neutralizing antibodies and protection  
326 from disease in a small animal model. *Science* **369**, 956-963 (2020).
- 327 43. C. O. Barnes *et al.*, Structures of human antibodies bound to SARS-CoV-2 spike reveal  
328 common epitopes and recurrent features of antibodies. *Cell* **182**, 828-842 e816 (2020).
- 329 44. D. Pinto *et al.*, Cross-neutralization of SARS-CoV-2 by a human monoclonal SARS-CoV  
330 antibody. *Nature* **583**, 290-295 (2020).
- 331 45. L. Hanke *et al.*, An alpaca nanobody neutralizes SARS-CoV-2 by blocking receptor  
332 interaction. *Nat Commun* **11**, 4420 (2020).
- 333 46. X. Chen *et al.*, Human monoclonal antibodies block the binding of SARS-CoV-2 spike  
334 protein to angiotensin converting enzyme 2 receptor. *Cell Mol Immunol* **17**, 647-649  
335 (2020).
- 336 47. J. Wan *et al.*, Human-IgG-neutralizing monoclonal antibodies block the SARS-CoV-2  
337 infection. *Cell Rep* **32**, 107918 (2020).
- 338 48. P. Padmanabhan, N. M. Dixit, Modeling suggests a mechanism of synergy between  
339 hepatitis C virus entry inhibitors and drugs of other classes. *CPT Pharmacometrics Syst*  
340 *Pharmacol* **4**, 445-453 (2015).
- 341 49. T. C. Chou, Theoretical basis, experimental design, and computerized simulation of  
342 synergism and antagonism in drug combination studies. *Pharmacol Rev* **58**, 621-681  
343 (2006).
- 344 50. P. Padmanabhan, R. Desikan, N. M. Dixit, Targeting TMPRSS2 and Cathepsin B/L  
345 together may be synergistic against SARS-CoV-2 infection. *PLoS Comput Biol* **16**,  
346 e1008461 (2020).

- 347 51. V. I. Zarnitsyna *et al.*, Mathematical model reveals the role of memory CD8 T cell  
348 populations in recall responses to Influenza. *Front Immunol* **7**, 165 (2016).
- 349 52. R. Ke, C. Zitzmann, R. M. Ribeiro, A. S. Perelson, Kinetics of SARS-CoV-2 infection in  
350 the human upper and lower respiratory tracts and their relationship with infectiousness.  
351 *medRxiv* 10.1101/2020.1109.1125.20201772 (2020).
- 352 53. D. A. Swan *et al.*, Vaccines that prevent SARS-CoV-2 transmission may prevent or dampen  
353 a spring wave of COVID-19 cases and deaths in 2021. *medRxiv*  
354 10.1101/2020.1112.1113.20248120 (2020).
- 355 54. A. S. Perelson, R. Ke, Mechanistic modeling of SARS-CoV-2 and other infectious diseases  
356 and the effects of therapeutics. *Clin Pharmacol Ther* 10.1002/cpt.2160 (2020).
- 357 55. N. Dagan *et al.*, BNT162b2 mRNA COVID-19 vaccine in a nationwide mass vaccination  
358 setting. *N Engl J Med*, 10.1056/NEJMoa2101765 (2021).
- 359 56. E. E. Walsh *et al.*, Safety and immunogenicity of two RNA-Based COVID-19 vaccine  
360 candidates. *N Engl J Med* **383**, 2439-2450 (2020).
- 361 57. E. J. Anderson *et al.*, Safety and immunogenicity of SARS-CoV-2 mRNA-1273 vaccine in  
362 older adults. *N Engl J Med* **383**, 2427-2438 (2020).
- 363 58. M. Voysey *et al.*, Single-dose administration and the influence of the timing of the booster  
364 dose on immunogenicity and efficacy of ChAdOx1 nCoV-19 (AZD1222) vaccine: a pooled  
365 analysis of four randomised trials. *Lancet* **397**, 881-891 (2021).

366

367



368 **Acknowledgements**

369 **Funding:** This work was supported by the DBT/Wellcome Trust India Alliance Senior  
370 Fellowship IA/S/14/1/501307 to NMD. **Author contributions:** PP: Conceptualization,  
371 Investigation, Formal analysis, Writing-original draft, Writing-review & editing; RD: Formal  
372 analysis, Writing-review & editing. NMD: Conceptualization, Writing-original draft, Writing-  
373 review & editing. **Competing interests:** The authors declare that no conflicts of interests exist.  
374 **Data and materials availability:** All relevant data are available within the manuscript and  
375 supplementary materials.

376
